# Supplementary material for: Structural insights of ZIP4 extracellular domain critical for optimal zinc transport
Source: Nat Commun. 2016 Jun 20;7:11979. doi: 10.1038/ncomms11979 (PMC4915132; doi:10.1038/ncomms11979)
Supplement: Supplementary Information — Supplementary Figures 1-12 and Supplementary Table 1. [file ncomms11979-s1.pdf]

Supplementary Information

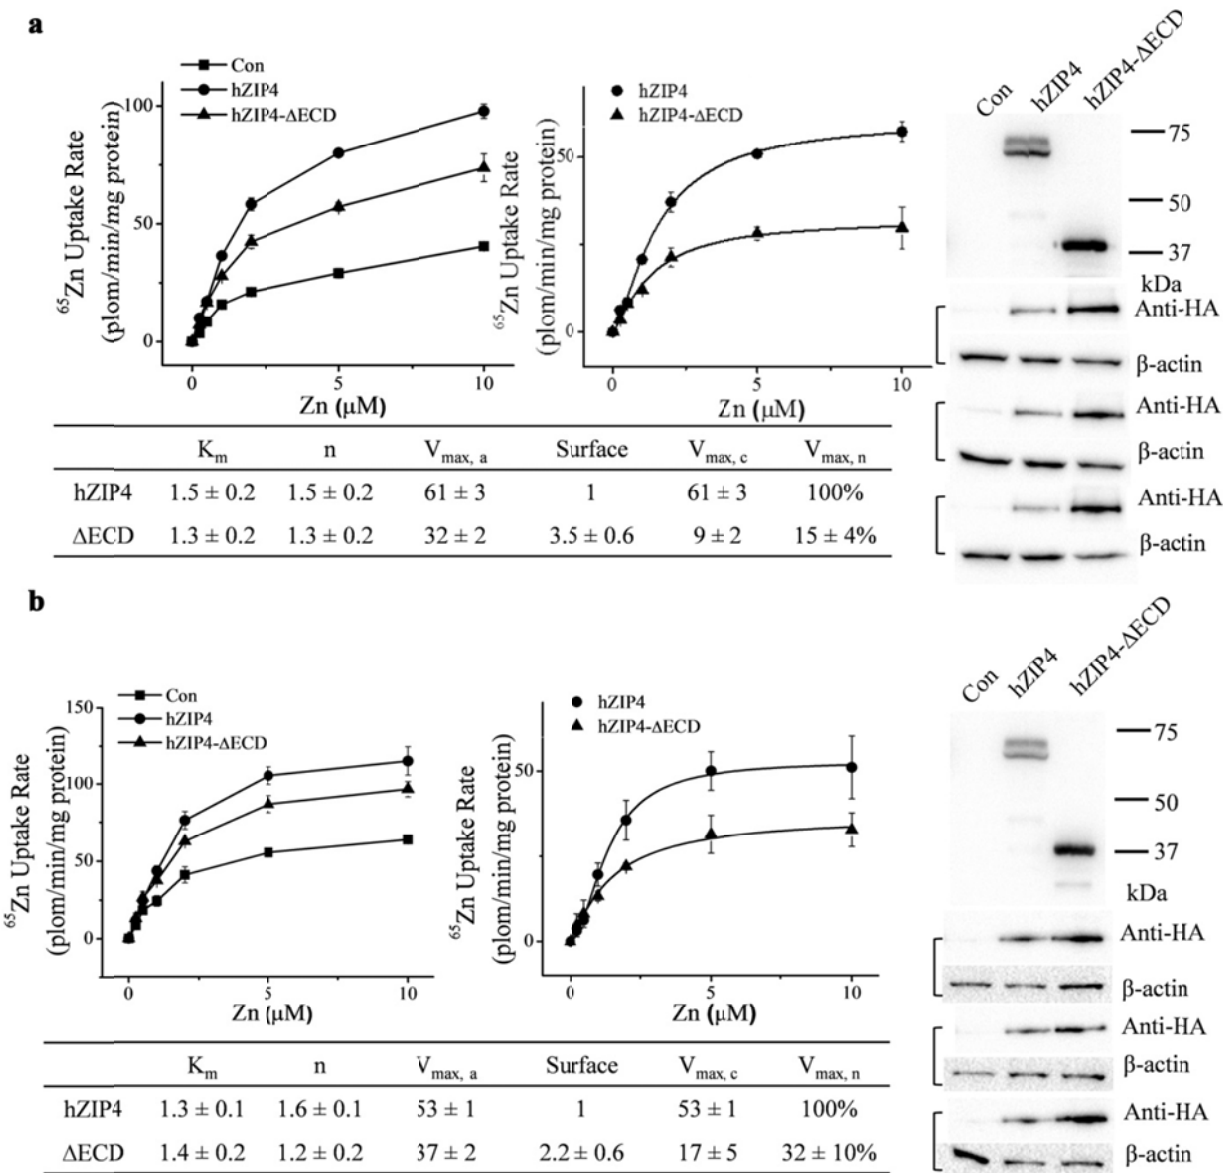

**Supplementary Figure 1** | Zinc uptake assay of hZIP4 and hZIP4-ΔECD transiently expressed in HEK293T cells. The results of one representative experiment are shown in **Fig. 1** in the main text and **(a)** & **(b)** show the other two independent datasets, respectively. Each dataset includes: **(left)** the raw experimental data; **(middle)** the processed data; **(right)** western blot of the corresponding constructs,

surface expression detection using anti-HA antibody with three replicates, and western blot of  $\beta$ -actin as loading control; **(bottom)** zinc uptake kinetics parameters. The units of  $K_m$  and  $V_{max}$  are  $\mu M$  and  $pmol\ min^{-1}\ mg^{-1}$ , respectively. The normalized and calibrated  $V_{max}$ s are used for statistical analysis shown in **Fig. 1d**.

```

hE1P4-EDD                                     SQGGALDQEGALGGLLTLDARVHC 58
pE1P4-EDD                                     SQGGALDRVGLGGLLTLDARVHC 60
                                     *****
hE1P4-EDD  NGPGCGKCLSVEDALGLGEPGSGLPVGPVLEARYVARLSAAAVLYLSNPEGTCEDTRAGL 118
pE1P4-EDD  SQPGCGKCLSVGLLALGRFE-----EPGLHARLSAAAVLYLSNPEGTCEDTRAGL 118
                                     *****
hE1P4-EDD  WASHADHLLALLESFALKTPLGSLWLLQRMQAAGQTPK-TACVDIPQLLEAVGAGAGAP 177
pE1P4-EDD  WASHADHLLALLESFALKAFLGSLRLLRQIQATVTTGQSAGEACVDPQLLEAVGAGAGAP 170
                                     *****
hE1P4-EDD  SAGGVVLTALLERVSGSCHFTLPTFGYVDFVFGQHSSEVP-VTAEIALAQRLGVG-- 234
pE1P4-EDD  SAGGVVLTALLERVSGSCHFTLPTFGYVDFVFGQHSNGTIVTAEIALAQRLGVGVG 230
                                     *****
hE1P4-EDD  REANSDSHRHRRGASSRDFVFLISSNSSSSWDTVCLSLARDVMAAYGLSEQGVTFEAMA 294
pE1P4-EDD  TETHSDHHQKEQVNRGQPTFLTAPNSSSDTDTVCLSLARDVMAVGLSEQGVTFEAMA 290
                                     *****
hE1P4-EDD  QLSFALQLQQQLSGACSGSRSFFVQQLGQSER 326
pE1P4-EDD  QLSFALQLQQQLSGACSGPSRFPAGQLQSAEX 322
                                     *****

```

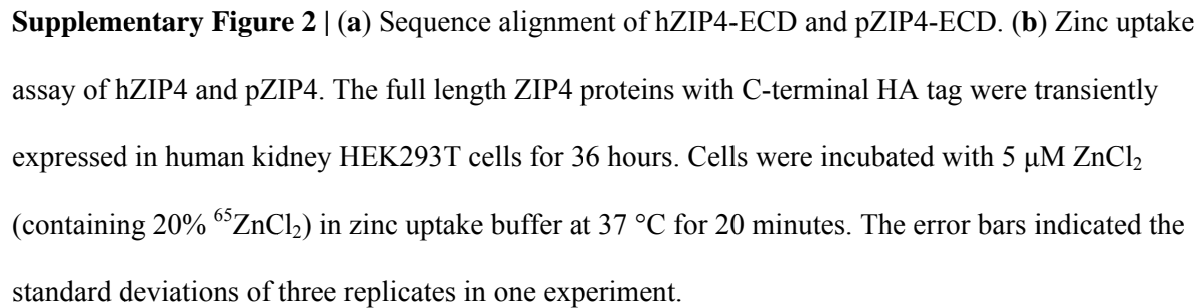

**a**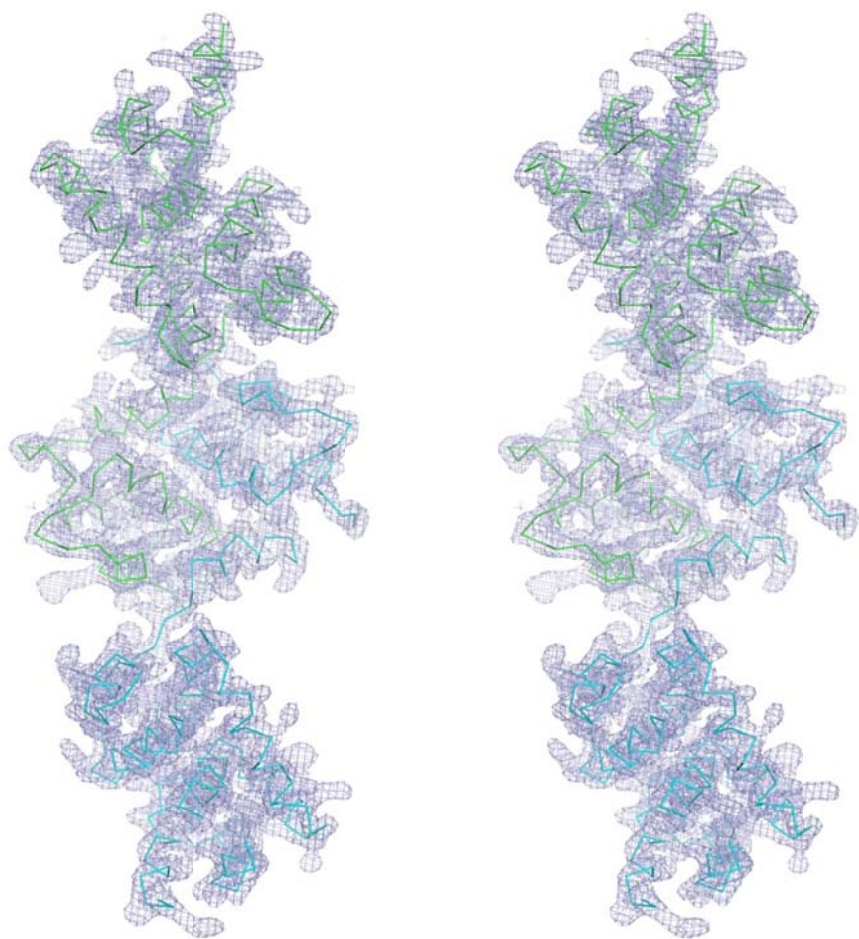**b**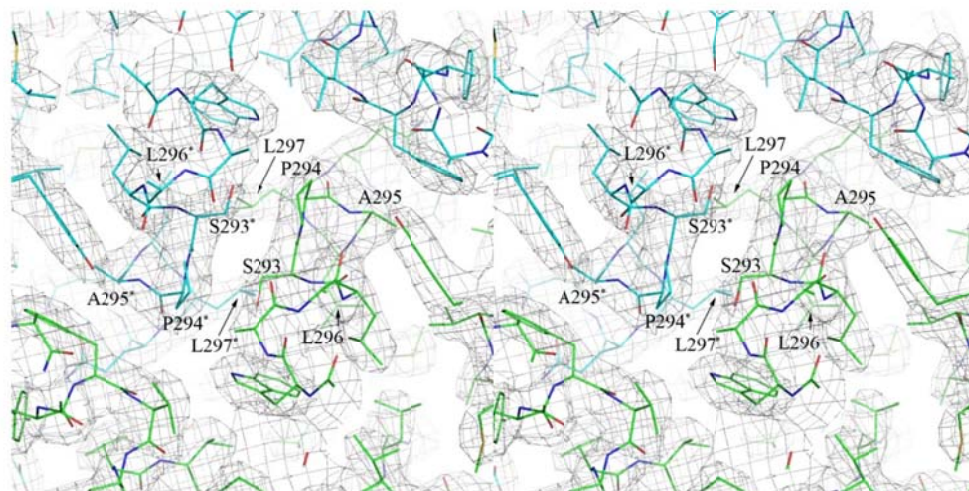

**Supplementary Figure 3** | Stereo view of 2F<sub>o</sub>-F<sub>c</sub> electron density map (σ=1) in one asymmetric unit of pZIP4-ECD crystal. **(a)** pZIP4-ECD dimer. **(b)** The dimerization interface of the PCD. The residues in the proximity of the “PAL” motif are labeled.

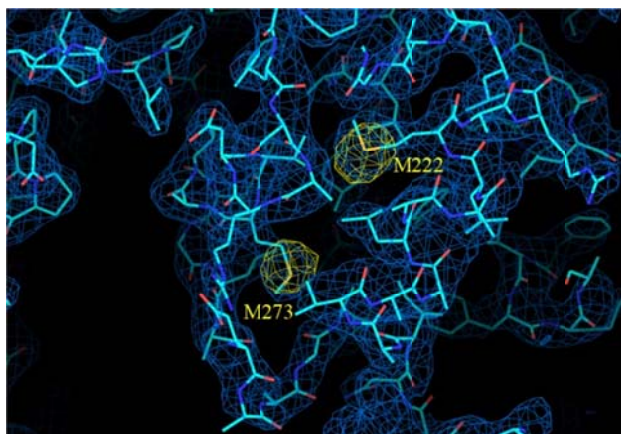

**Supplementary Figure 4** | The anomalous difference Fourier map ( $\sigma=5$ , yellow) of selenium atoms in pZIP4-ECD. The  $2F_o - F_c$  map is shown in blue at  $\sigma=1$ .

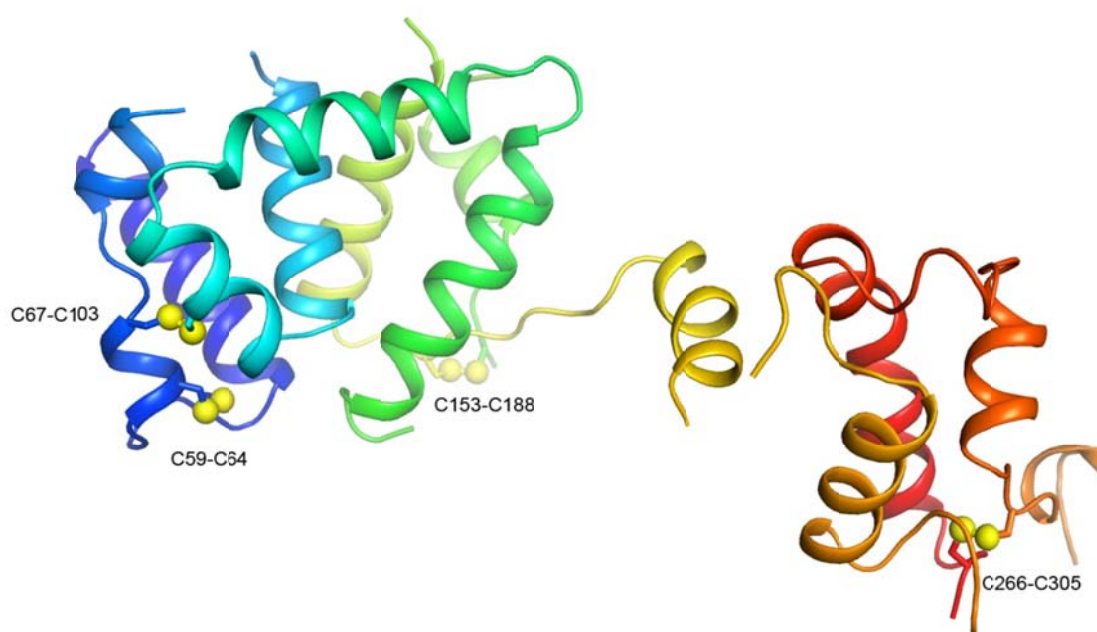

**Supplementary Figure 5** | Disulfide bonds in pZIP4-ECD. The monomeric pZIP4-ECD is shown in cartoon mode and the sulfur atoms are depicted as yellow balls.

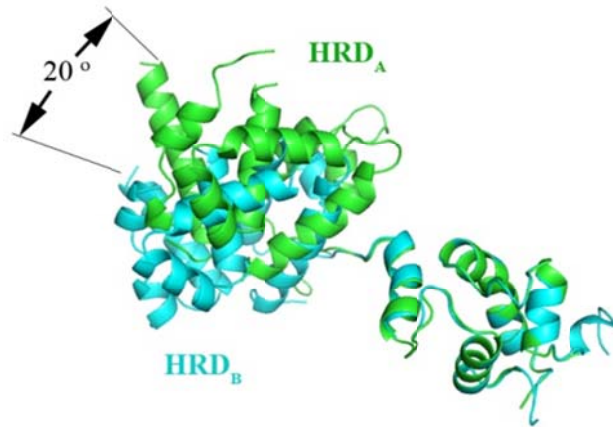

**Supplementary Figure 6** | Structural comparison of the two pZIP4-ECD molecules in one asymmetric unit. The PCDs are superimposed to reveal the different orientations of the HRDs relative to the PCDs. The HRD<sub>B</sub> in blue rotates 20 degree from the position of the HRD<sub>A</sub> in green.

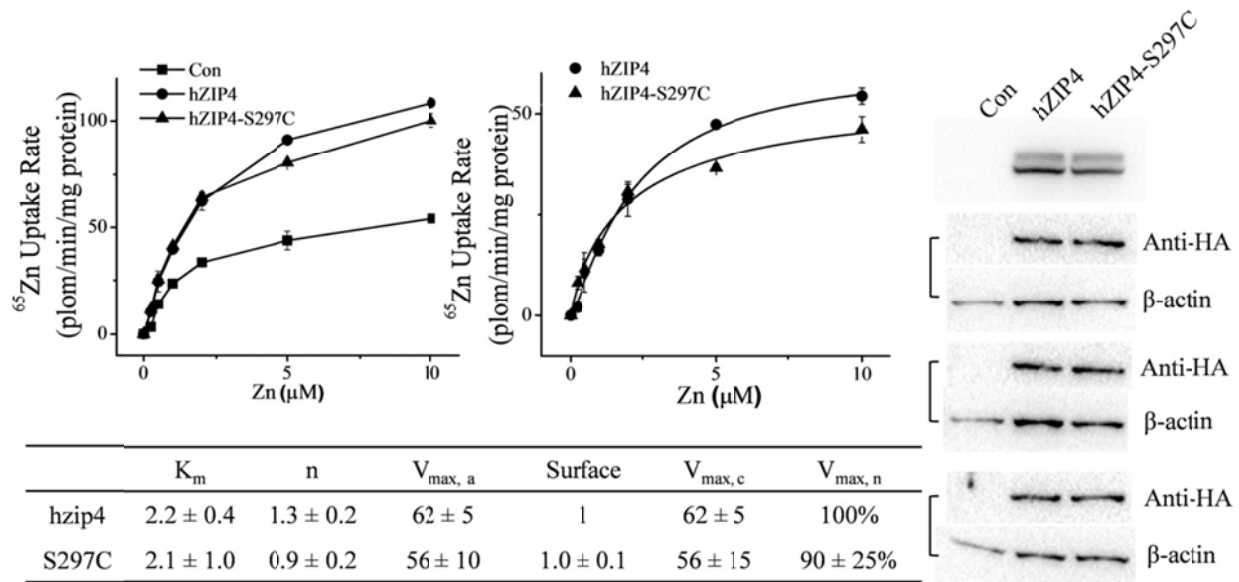

**Supplementary Figure 7** | Zinc uptake assay of hZIP4-S297C. The results are from one experiment, which include: **(left)** the raw experimental data; **(middle)** the processed data; **(right)** western blot of the corresponding constructs, surface expression detection using anti-HA antibody with three replicates, and western blot of  $\beta$ -actin as loading control; **(bottom)** zinc uptake kinetics parameters (The units of  $K_m$  and  $V_{max}$  are  $\mu\text{M}$  and  $\text{pmol min}^{-1} \text{mg}^{-1}$ , respectively).

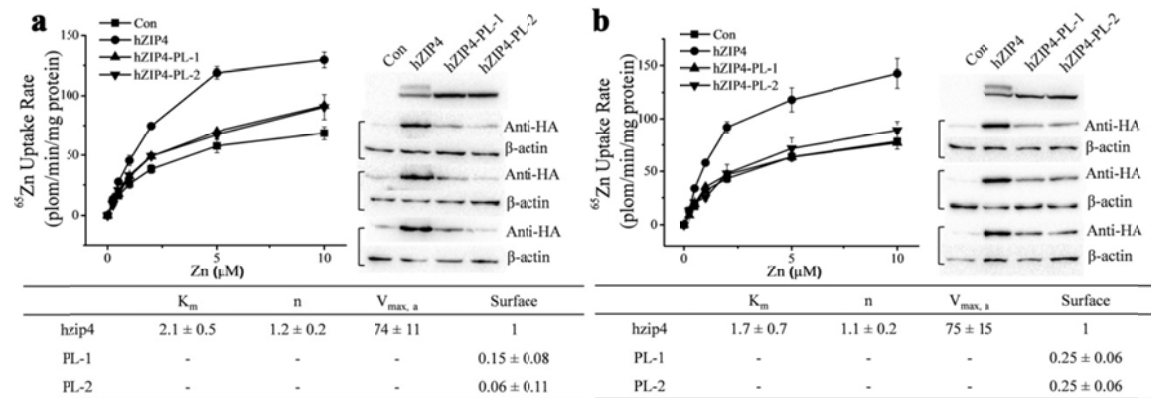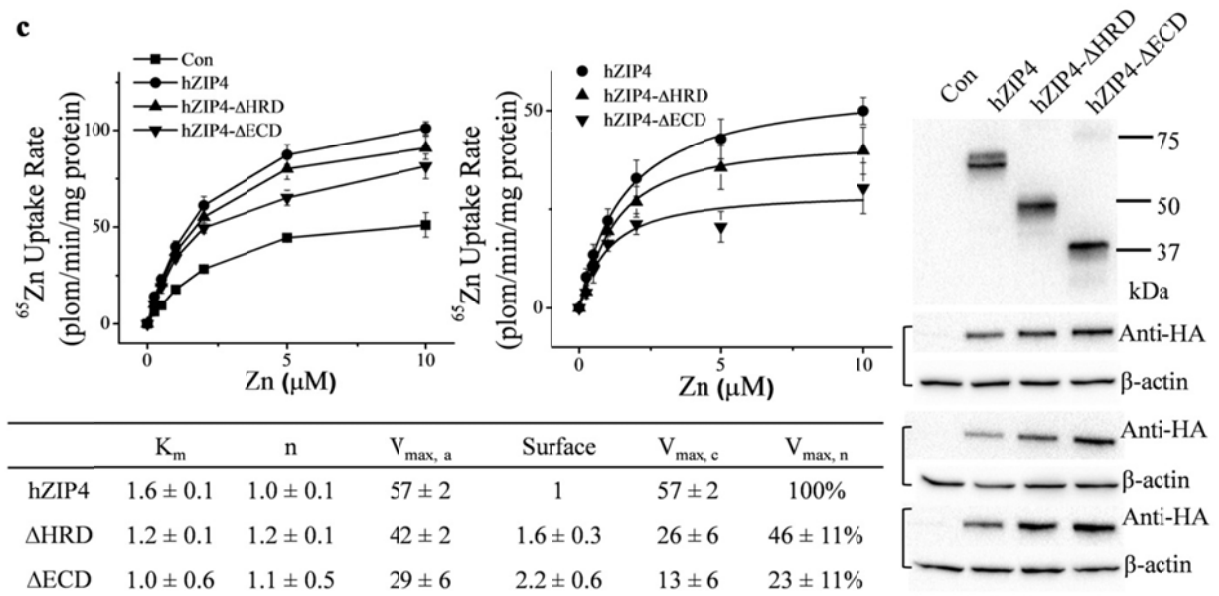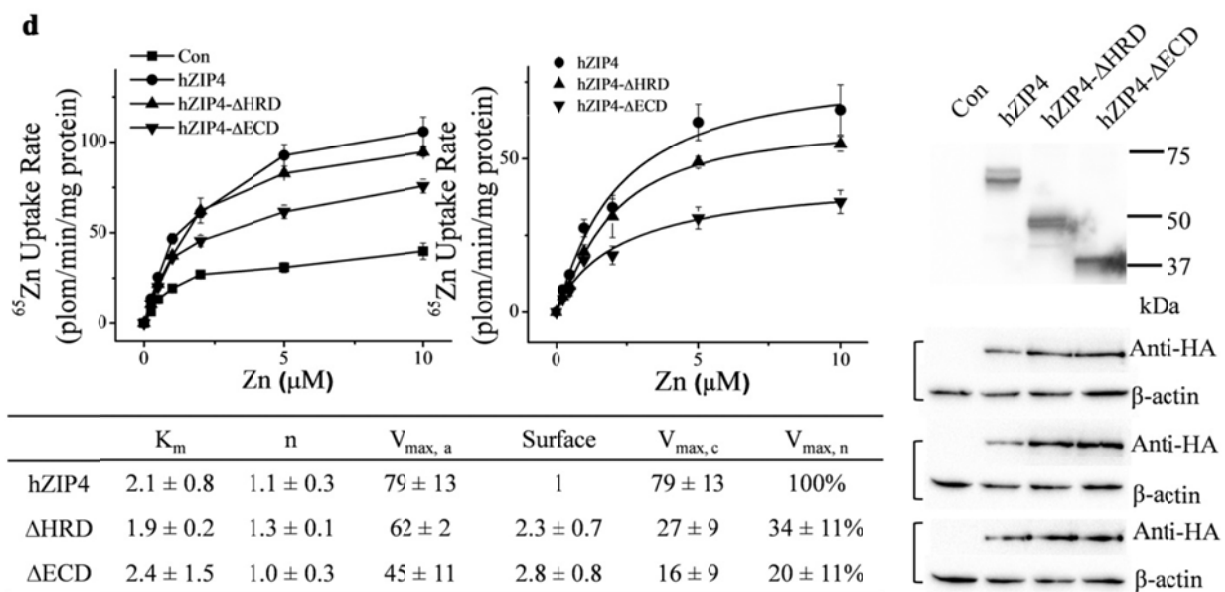

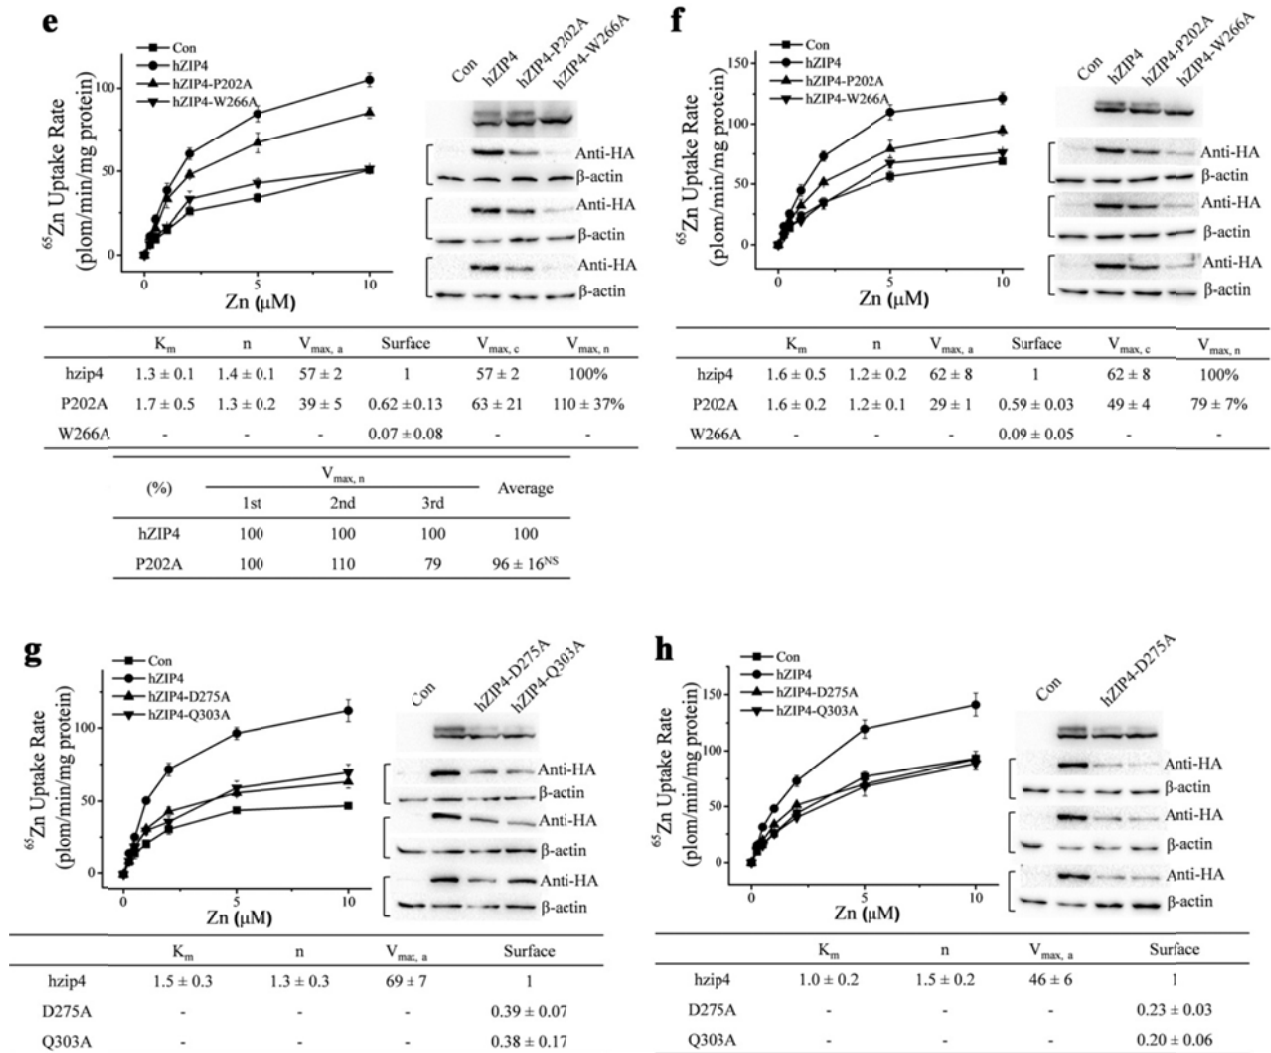

**Supplementary Figure 8** | Zinc uptake assays of ZIP4 constructs and mutants transiently expressed in HEK293T cells. (a) & (b) WT hZIP4 and the P298A and L300A double mutant (PL). (c) & (d) WT hZIP4, hZIP4-ΔHRD and hZIP4-ΔECD. (e) & (f) WT hZIP4, P202A and W266A. (g) & (h) WT hZIP4, D275A and Q303A. For each construct and mutant, two additional independent datasets are shown here and the results of one representative experiment are shown in **Fig. 3, 4** and **5** in the main text. Each dataset includes: (left) the raw experimental data; (middle) the processed data (Note: there is no processed data for some constructs, because their activities are too low to be properly processed); (right)

western blot of the corresponding constructs, surface expression detection using anti-HA antibody with three replicates, and western blot of  $\beta$ -actin as loading control; **(bottom)** zinc uptake kinetics parameters. The units of  $K_m$  and  $V_{max}$  are  $\mu M$  and  $pmol\ min^{-1}\ mg^{-1}$ , respectively. The normalized  $V_{max}$ s are used for statistical analysis shown in the corresponding figures in the main text.

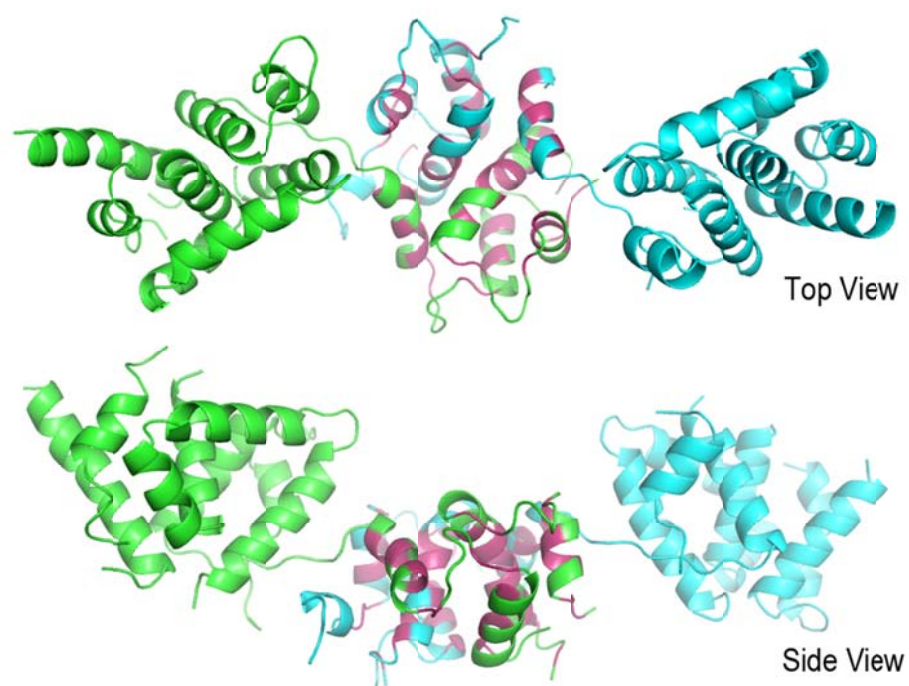

**Supplementary Figure 9** | Mapping of the conserved residues (in pink) in the LIV-1 proteins (shown in **Fig. 7b**) on the structure of pZIP4-ECD dimer.

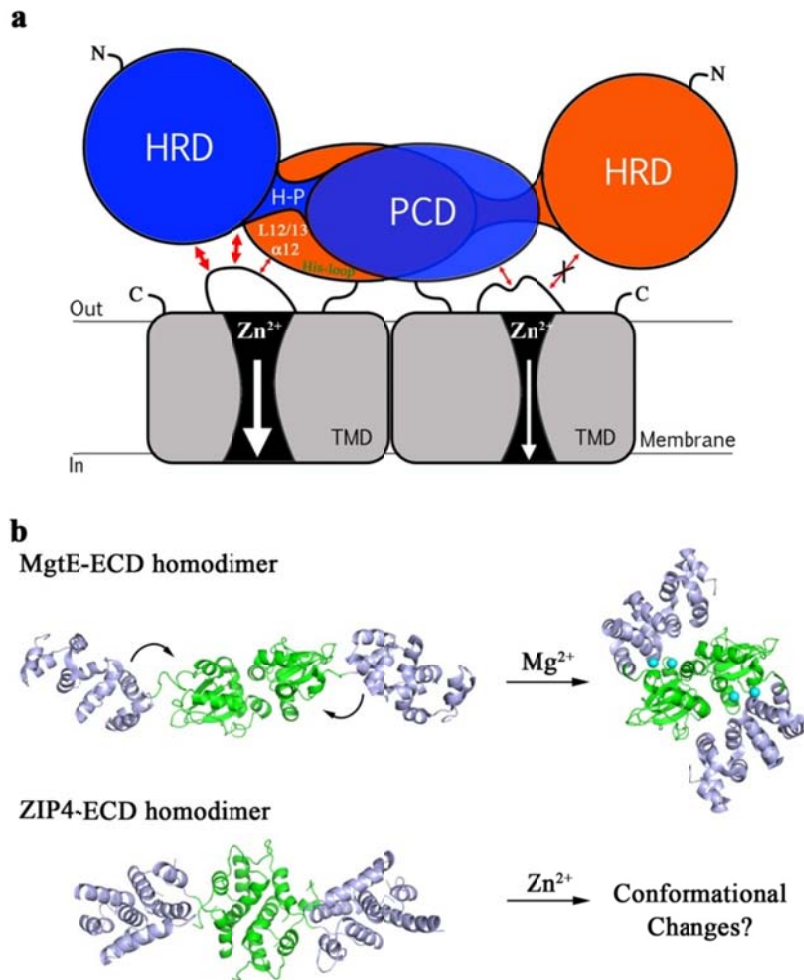

**Supplementary Figure 10 | Working hypotheses of ZIP4-ECD. (a)** ZIP4-ECD functions as an accessory of the zinc transport machinery. In the molecule on the left (blue), the HRD is properly positioned on top of the TMD through the bridging region (H-P linker,  $\alpha 12$  and L12 and 13) connecting the HRD and the central dimeric PCD. Through the hypothetical interactions between the HRD and bridging region and the extracellular loops on the TMD (indicated by red arrows), ZIP4-ECD promotes zinc transport by keeping the zinc transport machinery in a functional state. In the molecule on the right (orange), the AE-causing mutations result in altered conformation of the HRD and or the bridging region, disrupting the interactions between the HRD and bridging region and the TMD and leading to less-functional states of the zinc transport machinery. **(b)** ZIP4-ECD functions as an extracellular zinc sensor. Crystal structures of

MgtE-ECD in apo state (left, PDB code 2YVZ) and  $Mg^{2+}$ -bound state (right, PDB code 2YVY) are compared with the structure of pZIP4-ECD.  $Mg^{2+}$  (cyan balls) binding induced conformational change in MgtE-ECD, indicated by the arrows, establishes its function as an  $Mg^{2+}$  sensor. pZIP4-ECD in apo state is also an extended dimeric structure with two structurally independent subdomains linked with a flexible linker. For better comparison, the *N*-terminal subdomain in MgtE-ECD and the HRD in ZIP4-ECD are colored in light blue, and the *C*-terminal dimeric subdomain in MgtE-ECD and the dimeric PCD in ZIP4-ECD are colored in green. The similarity in domain structure and overall structural arrangement raise a hypothesis that ZIP4-ECD may undergo similar conformational changes upon zinc binding at ZIP4-ECD, although ZIP4 shows no homology to MgtE. Through a coupled movement between the ECD and the TMD, zinc ions may regulate the functional status of the zinc transport machinery as proposed in MgtE study (ref 41&42 in the main text).

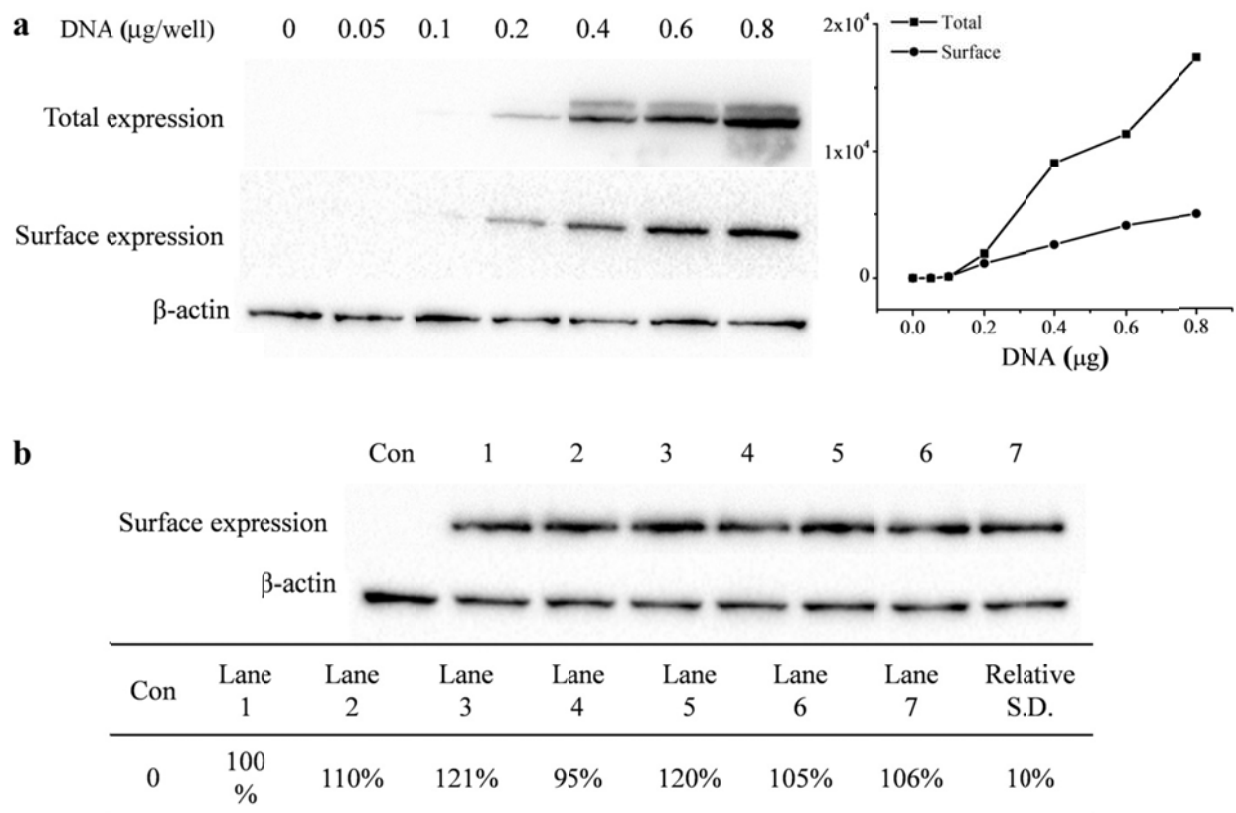

**Supplementary Figure 11 | ZIP4 surface expression detection. (a)** Quantitated surface expression levels are correlated with the amount of plasmid DNA used in transfection. Different amounts of plasmid DNA encoding hZIP4-HA were used in transfection with the same DNA to Lipofectamine® 2000 ratio. After 36 hours post transfection, the surface expression levels of hZIP4-HA were detected using anti-HA antibody and quantitated using Image Lab (Bio Rad) program (**left**). As loading control, β-actin in the sample was detected by western blot using anti-β-actin antibody. The generally positive correlation demonstrates the current approach is sensitive enough to quantitatively detect the changes of hZIP4 surface expression level (**right**). **(b)** Consistency of the surface expression level detection. The HEK293T cells cultured in the same 24-well plate were transfected with the same amount of DNA with the same DNA to Lipofectamine® 2000 ratio. After 36 hours post transfection, the surface expression levels of hZIP4-HA were detected using anti-HA antibody and quantitated using Image Lab (Bio Rad) program

**(top)**. As loading control,  $\beta$ -actin in the sample was detected by western blot using anti- $\beta$ -actin antibody. The small relative standard deviation (S.D.) of seven replicates indicates the current approach is reliable to determine quantitated surface expression level for statistical analysis **(bottom)**.

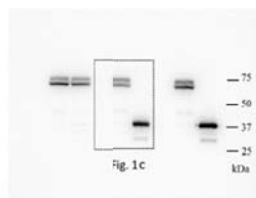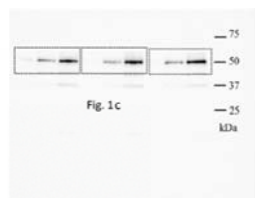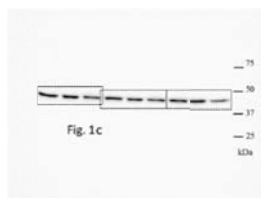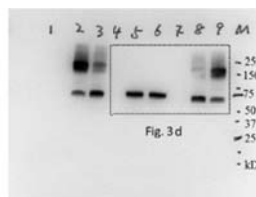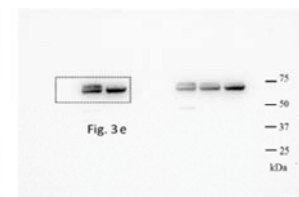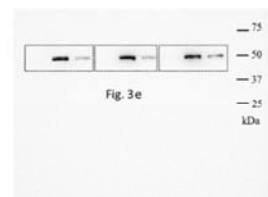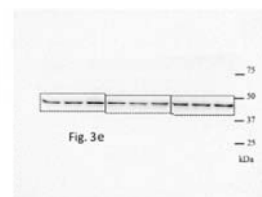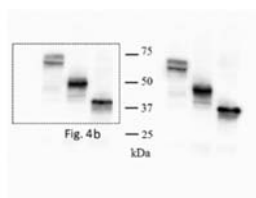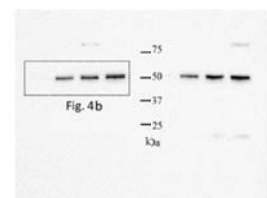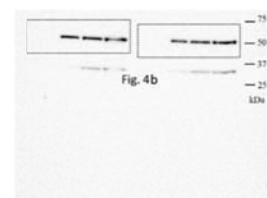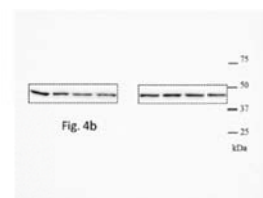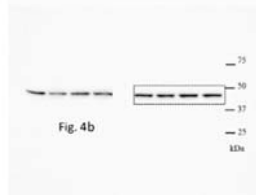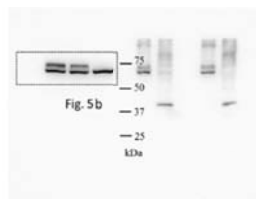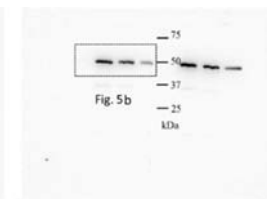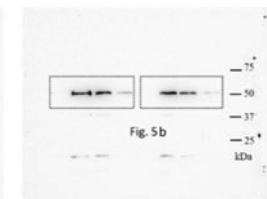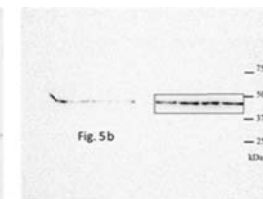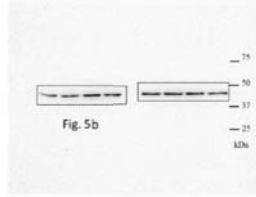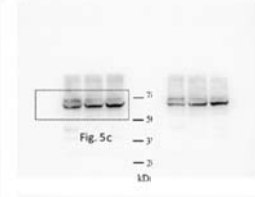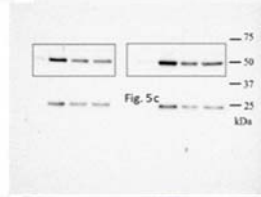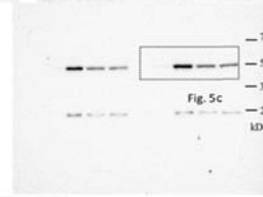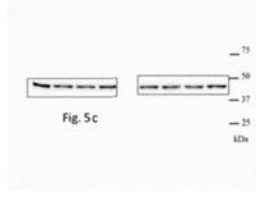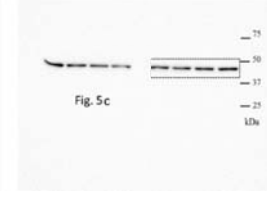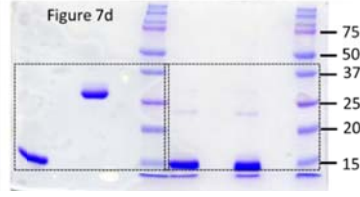

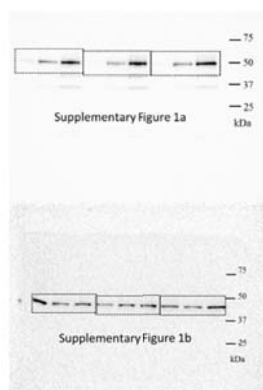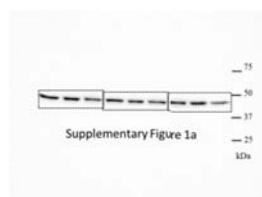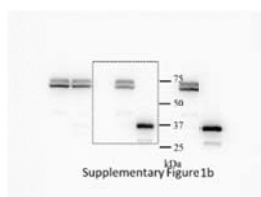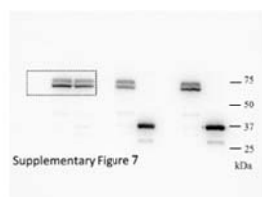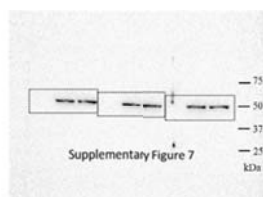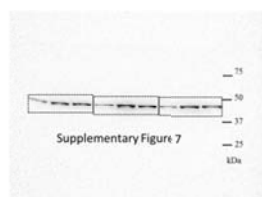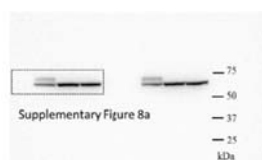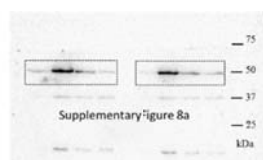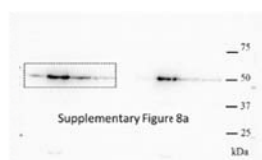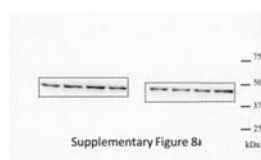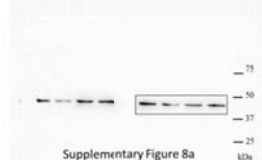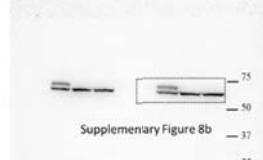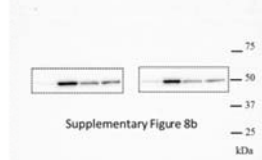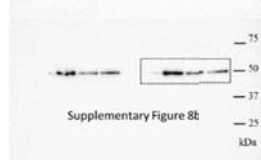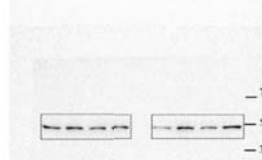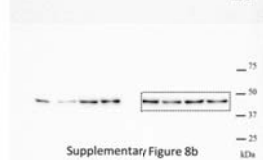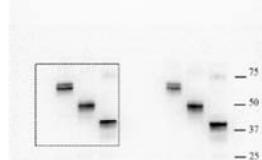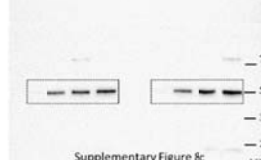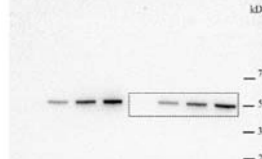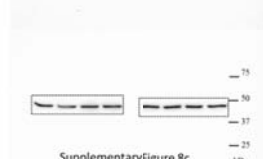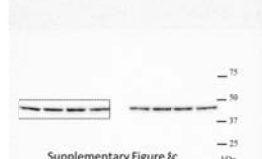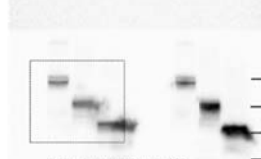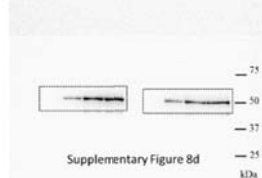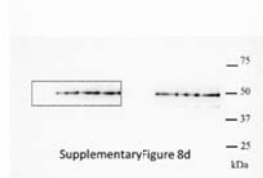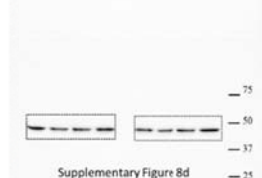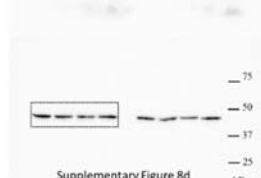

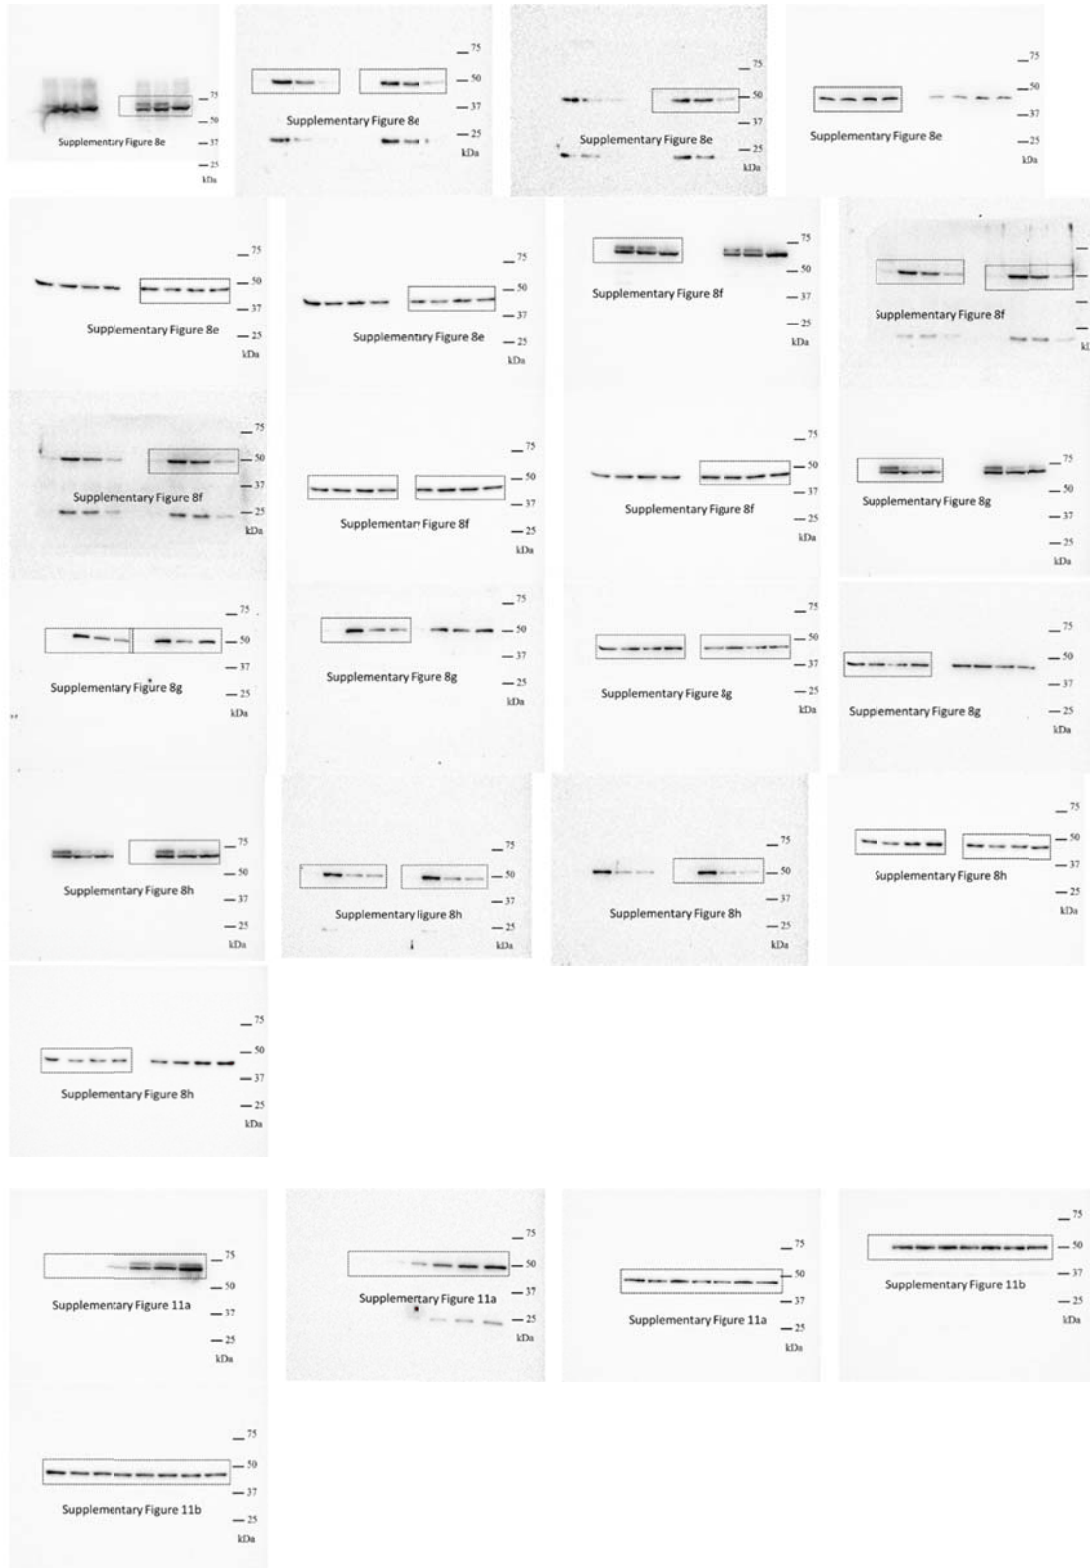

**Supplementary Figure 12** | Uncropped Western blots and SDS-PAGE gel in main text and supplementary information.

**Supplementary Table 1** | The primers used in this work.

| Primer                        | Sequence                                                       |
|-------------------------------|----------------------------------------------------------------|
| hZIP cDNA ΔHRD fusion reverse | CAAAGTCCACGAAGTACTGAGGGCTCGGCAAGGCGTGGCCCTGGCCAGAGGTGAGCAG 3'  |
| hZIP cDNA ΔHRD fusion forward | CTGCTGGTCTGCTGAGCCTGCTCACCTCTGGCCAGGGCCACGCCTTGCCGAGCCCTCAG 3' |
| hZIP cDNA ΔECD fusion reverse | GATACCTCTCTGACTGGCTGAGCTGGTCCTGGCCCTGGCCAGAGGTGAGCAGGCTC 3'    |
| hZIP cDNA ΔECD fusion forward | CTGCTGAGCCTGCTCACCTCTGGCCAGGGCCAGGACCAGCTCAGCCAGTCAGAGA 3'     |
| P202A Forward                 | GCTTCCACGCCTTGCCGAGCGCGCAGTACTTCGTGGACTTTG 3'                  |
| P202A Reverse                 | CAAAGTCCACGAAGTACTGCGCGCTCGGCAAGGCGTGGAAGC 3'                  |
| W266A Forward                 | CAGCAACAGCTCCAGTGTGGCGGACACGGTATGCCTGAGTGC 3'                  |
| W266A Reverse                 | GCACTCAGGCATACCGTGTCCGCCACACTGGAGCTGTTGCTG 3'                  |
| D275A Forward                 | CGGTATGCCTGAGTGCCAGGGCGGTGATGGCTGCATATGGAC 3'                  |
| D275A Reverse                 | GTCCATATGCAGCCATCACCGCCCTGGCACTCAGGCATACCG 3'                  |
| P298L300A Forward             | GAGGCCTGGGCCCAACTGAGCGCCGCCGCCCTCCAACAGCAGCTGAGTGG 3'          |
| P298L300A Reverse             | CCACTCAGCTGCTGTTGGAGGGCGGCGGCGCTCAGTTGGGCCCAGGCCTC 3'          |
| Q303A Forward                 | CTGAGCCCTGCCCTGCTCCAAGCCCAGCTGAGTGGAGCCTGCAC 3'                |
| Q303A Reverse                 | GTGCAGGCTCCACTCAGCTGGGCTTGGAGCAGGGCAGGGCTCAG 3'                |
| S297C Forward                 | CGGAGGCCTGGGCCCAACTGTGCCCTGCCCTGCTCCAACAGCA 3'                 |
| S297C Reverse                 | TGCTGTTGGAGCAGGGCAGGGCACAGTTGGGCCCAGGCCTCCG 3'                 |
